# Supplementary material
Source: Springer Nature journal article supplement (http://www.springermedizin.de/resource/supplementary/13014_2010_323_MOESM1_ESM.pdf/9633190)

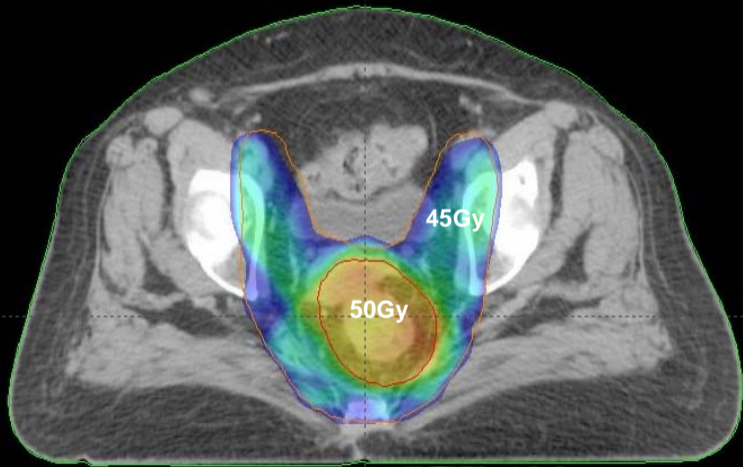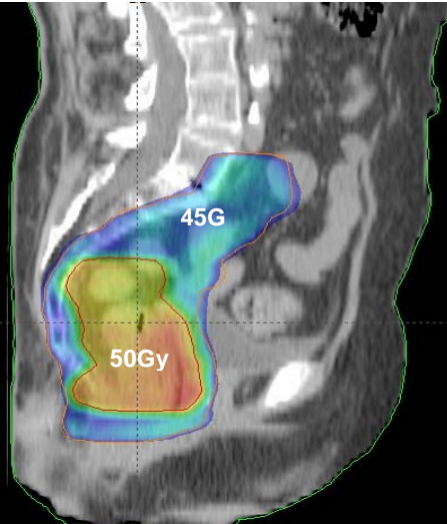

Supplement: MOESM1 [file 9633190]
